# Supplementary material
Source: Research Square preprint supplement (doi:10.21203/rs.3.rs-9390211/v1)
Supplement: Supplementary file 1 [file 5368c45cd413a677e13106b6.docx]

**Exploring Cavity Size–Dependent Control of Host–Guest Interactions in Cyclodextrins: Linking Spectroscopy, Binding Thermodynamics to Release and Biological Function of 4-Aminopyridine**

**Koushik Baula, Priyanka Roya, Subhankar Choudhuryb, Biswanath Karmakarc, Dibakar Ghoshc, Swarnendu Royc, Sangita Deyd, Anoop Kumard, Saurav Sarkare, Gouranga Nandie, Mahendra Nath Roya***

aDepartment of Chemistry, University of North Bengal, Darjeeling 734013, India

bDepartment of Chemistry, Malda College, Malda 732101, India

cPlant Biochemistry Laboratory, Department of Botany, University of North Bengal, Darjeeling 734013, India

dDepartment of Biotechnology, University of North Bengal, Darjeeling 734013, India

eDivision of Pharmaceutics, Department of Pharmaceutical Technology, University of North Bengal, Darjeeling 734013, India

a*Corresponding Author: Prof.(Dr.) Mahendra Nath Roy,

Email id- [mahendraroy2002@yahoo.co.i](mailto:mahendraroy2002@yahoo.co.i)

SUPPORTING INFORMATION

| COMPOUND NAME | MOLECULAR FORMULA | EXACT MOLECULAR MASS | CAS NUMBER | PURITY | PURCHASED FROM |
| --- | --- | --- | --- | --- | --- |
| 4-AMINO PYRIDINE | C5H6N2  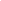 | 94.11 | 504-24-5 | >98.0% | SRL PVT. Ltd (INDIA) |
| α-CYCLODEXTRIN | C36H60O30 | 972.85 | 10016-20-3 | >98.0% | TCI INDIA PVT Ltd. |
| β-CYCLODEXTRIN | C42H70O35 | 1134.98 | 7585-39-9 | >97.0% | SIGMA-ALDRICH  India |

Table S1: Description of the materials purchased for the study

| 4-AP+α-CD system | | | | | | | |
| --- | --- | --- | --- | --- | --- | --- | --- |
| 4-AP (mL) | **α-CD (mL)** | **4-AP (μM)** | **α-CD (μM)** | **[4-AP]/([4-AP] +[α-CD])** | **Absorbance (A)** | **ΔA** | **ΔA×[4-AP]/([4-AP] +[α-CD])** |
| 0 | 3 | 0 | 100 | 0 | -0.0078 | 0.6112 | 0.0000 |
| 0.3 | 2.7 | 10 | 90 | 0.1 | 0.0464 | 0.5570 | 0.0557 |
| 0.6 | 2.4 | 20 | 80 | 0.2 | 0.1374 | 0.4660 | 0.0932 |
| 0.9 | 2.1 | 30 | 70 | 0.3 | 0.1595 | 0.4439 | 0.1332 |
| 1.2 | 1.8 | 40 | 60 | 0.4 | 0.2486 | 0.3548 | 0.1419 |
| 1.5 | 1.5 | 50 | 50 | 0.5 | 0.3099 | 0.2935 | 0.1468 |
| 1.8 | 1.2 | 60 | 40 | 0.6 | 0.3700 | 0.2334 | 0.1400 |
| 2.1 | 0.9 | 70 | 30 | 0.7 | 0.4280 | 0.1754 | 0.1228 |
| 2.4 | 0.6 | 80 | 20 | 0.8 | 0.4654 | 0.1380 | 0.1104 |
| 2.7 | 0.3 | 90 | 10 | 0.9 | 0.5627 | 0.0407 | 0.0366 |
| 3 | 0 | 100 | 0 | 1 | 0.6034 | 0.0000 | 0.0000 |

Table S2: Datasheet for plotting Job’s Plot of 4-AP+ α-CD system


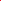

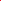


| **4-AP + β CD** | | | | | | | |
| --- | --- | --- | --- | --- | --- | --- | --- |
| **4-AP (mL)** | **β-CD (mL)** | **4-AP (μM)** | **β-CD (μM)** | **[4-AP]/([4-AP]+[β-CD])** | **Absorbance (A)** | **ΔA** | **ΔA×[4-AP]/([4-AP]+[β-CD])** |
| 0 | 3 | 0 | 100 | 0 | 0.0390 | 0.5644 | 0.0000 |
| 0.3 | 2.7 | 10 | 90 | 0.1 | 0.1150 | 0.1150 | 0.0115 |
| 0.6 | 2.4 | 20 | 80 | 0.2 | 0.1560 | 0.4474 | 0.0895 |
| 0.9 | 2.1 | 30 | 70 | 0.3 | 0.2050 | 0.3984 | 0.1195 |
| 1.2 | 1.8 | 40 | 60 | 0.4 | 0.2850 | 0.3184 | 0.1274 |
| 1.5 | 1.5 | 50 | 50 | 0.5 | 0.3350 | 0.2684 | 0.1342 |
| 1.8 | 1.2 | 60 | 40 | 0.6 | 0.4010 | 0.2024 | 0.1214 |
| 2.1 | 0.9 | 70 | 30 | 0.7 | 0.4420 | 0.1614 | 0.1130 |
| 2.4 | 0.6 | 80 | 20 | 0.8 | 0.4950 | 0.1084 | 0.0867 |
| 2.7 | 0.3 | 90 | 10 | 0.9 | 0.5750 | 0.0284 | 0.0256 |
| 3 | 0 | 100 | 0 | 1 | 0.6034 | 0.0000 | 0.0000 |

Table S3: Datasheet for plotting Job’s Plot of 4-AP+ β-CD system

| [4-AP] | [α-CD] | A0 | A | ΔA | 1/[α-CD] | 1/ΔA | Intercept | Slope | Ka/M-1 |
| --- | --- | --- | --- | --- | --- | --- | --- | --- | --- |
| 60 | 10 | 0.603405 | 0.6133759 | 0.00997 | 100000 | 100.2970196 | 1.35 | 0.001 | 1.35 × 103 |
| 20 | 0.603405 | 0.6235254 | 0.02012 | 50000 | 49.702019 |
| 30 | 0.603405 | 0.6352316 | 0.031826 | 33333 | 31.42070772 |
| 40 | 0.603405 | 0.6448259 | 0.04142 | 25000 | 24.14266966 |
| 50 | 0.603405 | 0.6608967 | 0.057491 | 20000 | 17.39396668 |
| 60 | 0.603405 | 0.6705799 | 0.067174 | 16666 | 14.88661594 |
| 70 | 0.603405 | 0.6731815 | 0.069776 | 14285 | 14.33156341 |
| 80 | 0.603405 | 0.6823583 | 0.078953 | 12500 | 12.66579702 |

Table S4: Datasheet for Association Constant measurement of 4-AP+ α-CD system

| [4-AP] | [β-CD] | A0 | A | ΔA | 1/[β-CD] | 1/ΔA | Intercept | Slope | Ka/M-1 |
| --- | --- | --- | --- | --- | --- | --- | --- | --- | --- |
| 60 | 10 | 0.603405 | | 0.6138759 | | --- | | | 0.01047 | | --- | | 100000 | | 95.50746267 | | --- | | 3.39 | 0.001 | 3.39 × 103 |
| 20 | 0.603405 | 0.6305254 | 0.02712 | 50000 | 36.87328279 |
| 30 | 0.603405 | 0.6402316 | 0.036826 | 33333 | 27.15462072 |
| 40 | 0.603405 | 0.6558259 | 0.05242 | 25000 | 19.07652816 |
| 50 | 0.603405 | 0.6558259 | 0.065491 | 20000 | 15.26922724 |
| 60 | 0.603405 | 0.6558259 | 0.072174 | 16666 | 13.85532168 |
| 70 | 0.603405 | 0.6851815 | 0.081776 | 14285 | 12.22851803 |
| 80 | 0.603405 | 0.6953583 | 0.091953 | 12500 | 10.87514594 |

Table S5: Datasheet for Association Constant measurement of 4-AP+ β-CD system

| Protons of β-CD |  | | |
| --- | --- | --- | --- |
| Various protons | **Chemical shifts (δ1) in Pure β-CD** | **Chemical shifts (δ2) in IC** | **δ2 - δ1** |
| H-1 | 5.07 | 4.99 | -0.08 |
| H-2 | 3.62 | 3.57 | -0.05 |
| H-3 | 3.97 | 3.87 | -0.10 |
| H-4 | 3.56 | 3.55 | -0.01 |
| H-5 | 3.85 | 3.79 | - 0.06 |
| Protons of 4AP | **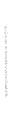Chemical shifts (δ1) Chemical shifts (δ2) δ2 - δ1**  **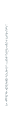In Pure 4-AP in IC** | | |
| HA | 7.93 | 7.96 | + 0.03 |
| HB | 6.55 | 6.65 | + 0.10 |

Table S6: Experimental chemical shifts data (ppm) of various protons in the free state of 4-AP, β-CD, and 4-AP- β-CD IC.

| Protons of αCD |  |
| --- | --- |
| Various protons | **Chemical shifts (δ1) in α-CD** | | **Chemical shifts (δ2) in IC** | **δ2 - δ1** |
| H-1 | 4.89 | | 4.89 | 0.00 |
| H-2 | 3.47 | | 3.48 | +0.01 |
| H-3 | 3.86 | | 3.81 | - 0.05 |
| H-4 | 3.41 | | 3.42 | +0.01 |
| H-5 | 3.72 | | 3.70 | - 0.02 |
| Protons of 4AP |  |
| HA | 7.93 | | 7.92 | - 0.01 |
| HB | 6.55 | | 6.58 | +0.03 |

Table S7:**:** Experimental chemical shifts data (ppm) of various protons in the free state of 4-AP, α-CD, and 4-AP- α-CD IC.

| **Time (h)** | **√t** | **Log t** | **Absorbance (A)** | **Concentration (mcg)** | **Amount of drug** | **Amount of drugs released** | **CR** | **CPR** | **Log CPR** | **f=(CPR/100)** | **1-f** | **(1-f)1/3** |
| --- | --- | --- | --- | --- | --- | --- | --- | --- | --- | --- | --- | --- |
| 1 h | 1 | 0 | 0.955 | 22.778769 | 0.04555754 | 0.79725691 | 0.79725691 | 33.4583787 | 1.52450489 | 0.334583787 | 0.66541621 | 0.87303394 |
| 2 h | 1.41421356 | 0.30103 | 1.151 | 24.5272079 | 0.04905442 | 0.85845227 | 0.85845227 | 36.0265566 | 1.55662275 | 0.360265566 | 0.63973443 | 0.86165466 |
| 3 h | 1.73205081 | 0.47712125 | 1.183 | 24.8126673 | 0.04962533 | 0.86844335 | 0.86844335 | 36.4458509 | 1.56164809 | 0.364458509 | 0.63554149 | 0.85976805 |
| 4 h | 2 | 0.60205999 | 1.247 | 25.3835861 | 0.05076717 | 0.88842551 | 0.88842551 | 37.2844396 | 1.57152762 | 0.372844396 | 0.6271556 | 0.85596979 |
| 5 h | 2.23606798 | 0.69897 | 1.271 | 25.5976806 | 0.05119536 | 0.89591882 | 0.89591882 | 37.5989104 | 1.57517526 | 0.375989104 | 0.6240109 | 0.85453671 |

Table S8: Cumulative release percentage (CRP) of 4-AP- α-CD IC.

| **Time (h)** | **√t** | **Log t** | **Absorbance (A)** | **Concentration (mcg)** | **Amount of drug** | **Amount of drug released** | **CR** | **CPR** | **Log CPR** | **f=(CPR/100)** | **1-f** | **(1-f)1/3** |
| --- | --- | --- | --- | --- | --- | --- | --- | --- | --- | --- | --- | --- |
| 1 h | 1 | 0 | 0.3757 | 17.6110616 | 0.03522212 | 0.61638715 | 0.61638715 | 25.8678407 | 1.41276018 | 0.258678407 | 0.74132159 | 0.90504231 |
| 2 h | 1.41421356 | 0.30103 | 0.4122 | 17.9366637 | 0.03587333 | 0.62778323 | 0.62778323 | 26.3460983 | 1.42071631 | 0.263460983 | 0.73653902 | 0.90309184 |
| 3 h | 1.73205081 | 0.47712125 | 0.4212 | 18.0169492 | 0.0360339 | 0.63059322 | 0.63059322 | 26.4640249 | 1.4226559 | 0.264640249 | 0.73535975 | 0.90260961 |
| 4 h | 2 | 0.60205999 | 0.4302 | 18.0972346 | 0.03619447 | 0.63340321 | 0.63340321 | 26.5819514 | 1.42458686 | 0.265819514 | 0.73418049 | 0.90212686 |
| 5 h | 2.23606798 | 0.69897 | 0.4289 | 18.0856378 | 0.03617128 | 0.63299732 | 0.63299732 | 26.5649176 | 1.42430847 | 0.265649176 | 0.73435082 | 0.90219662 |

Table S9: Cumulative release percentage (CRP) of 4-AP+ β-CD IC
